# Supplementary material for: Dysregulation of the mRNA Expression of Human Renal Drug Transporters by Proinflammatory Cytokines in Primary Human Proximal Tubular Epithelial Cells
Source: MDPI journal article supplement (doi:10.3390/pharmaceutics16020285), 2024-02-16
Supplement: s1 [file s1]

## Supplementary Materials

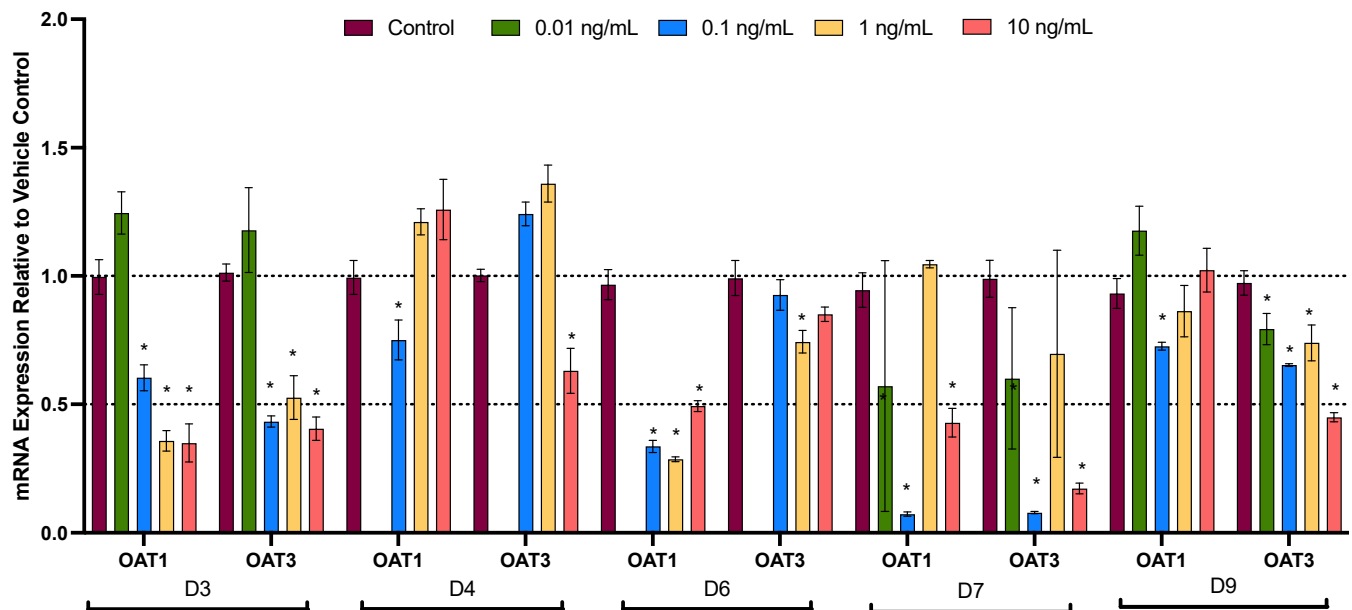

**Figure S1. Significant inter-individual (D = donor) variability was observed in the concentration-dependent effect of cytokine cocktails on the mRNA expression of OAT1 and 3 in PTECs.** Each cocktail contained all four cytokines at 0.01 (green bar), 0.1 (blue bar), 1 (yellow bar), or 10 ng/mL (orange bar). Data are expressed relative to the mRNA expression in the PTECs treated with the vehicle control (purple bar). Statistical significance ( $*p \leq 0.05$ ) was determined using ANOVA followed by post hoc Fisher's LSD test for pairwise comparisons between the treatment groups and the vehicle control. The quantification of the expression of the gene of interest for each donor was calculated using the comparative  $C_t$  value. GAPDH was used as the housekeeping gene. For D4 and D6, 0.01 ng/mL cocktail was not tested due to limited cell yield from kidney tissues.

**Table S1. Relative mRNA expression of renal drug transporters in PTECs prior to and after 48 hours of vehicle or cytokine cocktail treatment for donor 3 (D3).** The relative expression of transporter genes for each donor was normalized to the expression of the GAPDH, the housekeeping gene. The  $C_t$  values of GAPDH in this donor ranges from 20 to 20.5 for all the samples

| Donor                           | Donor 3            |                               |                                           |                                          |                                        |                                         |
|---------------------------------|--------------------|-------------------------------|-------------------------------------------|------------------------------------------|----------------------------------------|-----------------------------------------|
| Treatment Group<br>Transporter  | Prior to treatment | 48 hours of vehicle treatment | 48 hours of 0.01 ng/mL cocktail treatment | 48 hours of 0.1 ng/mL cocktail treatment | 48 hours of 1 ng/mL cocktail treatment | 48 hours of 10 ng/mL cocktail treatment |
| <b>Basolateral Transporters</b> |                    |                               |                                           |                                          |                                        |                                         |
| OAT1                            | 0.034 ± 0.004      | 0.0037 ± 0.0002               | 0.0046 ± 0.0002                           | 0.0022 ± 0.0002                          | 0.0013 ± 0.0001                        | 0.0013 ± 0.0002                         |
| OAT3                            | 0.023 ± 0.003      | 0.00253 ± 0.00007             | 0.0029 ± 0.0003                           | 0.00108 ± 0.00004                        | 0.0013 ± 0.0002                        | 0.00101 ± 0.00009                       |
| OATP4C1                         | 0.347 ± 0.003      | 0.046 ± 0.001                 | 0.047 ± 0.002                             | 0.0202 ± 0.0003                          | 0.0124 ± 0.0009                        | 0.0082 ± 0.0007                         |
| OCT2                            | 0.071 ± 0.002      | 0.053 ± 0.002                 | 0.0111 ± 0.0007                           | 0.030 ± 0.001                            | 0.0214 ± 0.0004                        | 0.0248 ± 0.0004                         |
| <b>Apical Transporters</b>      |                    |                               |                                           |                                          |                                        |                                         |
| BCRP                            | 0.0016 ± 0.0005    | 0.00127 ± 0.00002             | 0.00044 ± 0.00002                         | 0.00093 ± 0.00009                        | 0.00173 ± 0.00009                      | 0.0016 ± 0.0001                         |
| MATE1                           | 0.048 ± 0.003      | 0.025 ± 0.002                 | 0.0112 ± 0.0004                           | 0.0232 ± 0.0004                          | 0.0220 ± 0.0006                        | 0.0267 ± 0.0008                         |
| MATE2-K                         | 0.082 ± 0.001      | 0.013 ± 0.001                 | 0.00279 ± 0.00005                         | 0.0081 ± 0.0001                          | 0.0048 ± 0.0001                        | 0.0055 ± 0.0001                         |
| MRP2                            | 0.011 ± 0.002      | 0.0085 ± 0.0002               | 0.00170 ± 0.00003                         | 0.00405 ± 0.00007                        | 0.0026 ± 0.0002                        | 0.003 ± 0.001                           |
| MRP3                            | 0.036 ± 0.003      | 0.033 ± 0.002                 | 0.0174 ± 0.0005                           | 0.042 ± 0.001                            | 0.043 ± 0.002                          | 0.058 ± 0.004                           |
| MRP4                            | 0.0210 ± 0.0006    | 0.0229 ± 0.0004               | 0.0217 ± 0.0003                           | 0.0154 ± 0.0004                          | 0.0159 ± 0.0007                        | 0.020 ± 0.002                           |
| OAT4                            | 0.082 ± 0.004      | 0.037 ± 0.002                 | 0.00111 ± 0.00001                         | 0.014 ± 0.001                            | 0.0089 ± 0.0002                        | 0.0077 ± 0.0003                         |
| OCTN1                           | 0.0025 ± 0.0003    | 0.00156 ± 0.00004             | 0.00138 ± 0.00001                         | 0.00250 ± 0.00007                        | 0.0034 ± 0.0002                        | 0.0057 ± 0.0003                         |
| OCTN2                           | 0.035 ± 0.002      | 0.021 ± 0.001                 | 0.0171 ± 0.0004                           | 0.015 ± 0.001                            | 0.0122 ± 0.0002                        | 0.014 ± 0.001                           |
| P-gp                            | 0.032 ± 0.004      | 0.033 ± 0.002                 | 0.027 ± 0.002                             | 0.0223 ± 0.0003                          | 0.0149 ± 0.0003                        | 0.0129 ± 0.0002                         |

**Table S2. Relative mRNA expression of renal drug transporters in PTECs prior to and after 48 hours of vehicle or cytokine cocktail treatment for donor 4 (D4).** The relative expression of transporter genes for each donor was normalized to the expression of the GAPDH, the housekeeping gene. The  $C_t$  values of GAPDH in this donor ranges from 19.5 to 20 for all the samples. N/D, not determined.

| Donor                           | Donor 4            |                               |                                           |                                          |                                        |                                         |
|---------------------------------|--------------------|-------------------------------|-------------------------------------------|------------------------------------------|----------------------------------------|-----------------------------------------|
| Treatment Group<br>Transporter  | Prior to treatment | 48 hours of vehicle treatment | 48 hours of 0.01 ng/mL cocktail treatment | 48 hours of 0.1 ng/mL cocktail treatment | 48 hours of 1 ng/mL cocktail treatment | 48 hours of 10 ng/mL cocktail treatment |
| <b>Basolateral Transporters</b> |                    |                               |                                           |                                          |                                        |                                         |
| OAT1                            | 0.0032 ± 0.0002    | 0.00034 ± 0.00004             | N/D                                       | 0.00026 ± 0.00002                        | 0.00041 ± 0.00001                      | 0.00043 ± 0.00003                       |
| OAT3                            | 0.00024 ± 0.00004  | 0.000021 ± 0.000001           | N/D                                       | 0.000026 ± 0.000001                      | 0.000028 ± 0.000001                    | 0.000013 ± 0.000001                     |
| OATP4C1                         | 0.248 ± 0.008      | 0.0323 ± 0.0007               | N/D                                       | 0.028 ± 0.001                            | 0.0200 ± 0.0003                        | 0.0111 ± 0.0003                         |
| OCT2                            | 0.0338 ± 0.0005    | 0.0178 ± 0.0002               | N/D                                       | 0.0076 ± 0.0002                          | 0.0047 ± 0.0009                        | 0.0040 ± 0.0002                         |
| <b>Apical Transporters</b>      |                    |                               |                                           |                                          |                                        |                                         |
| BCRP                            | 0.00226 ± 0.00008  | 0.00156 ± 0.00009             | N/D                                       | 0.00097 ± 0.00003                        | 0.00092 ± 0.00006                      | 0.00075 ± 0.00005                       |
| MATE1                           | 0.0338 ± 0.0001    | 0.0121 ± 0.0001               | N/D                                       | 0.0104 ± 0.0005                          | 0.0094 ± 0.0006                        | 0.0106 ± 0.0003                         |
| MATE2-K                         | 0.0075 ± 0.0004    | 0.0012 ± 0.0001               | N/D                                       | 0.00032 ± 0.00004                        | 0.00016 ± 0.00001                      | 0.0002 ± 0.00001                        |
| MRP2                            | 0.0229 ± 0.0007    | 0.0186 ± 0.0006               | N/D                                       | 0.0185 ± 0.0007                          | 0.01820 ± 0.00006                      | 0.0201 ± 0.0005                         |
| MRP3                            | 0.019 ± 0.002      | 0.0199 ± 0.0005               | N/D                                       | 0.0264 ± 0.0008                          | 0.0310 ± 0.0002                        | 0.0294 ± 0.0004                         |
| MRP4                            | 0.0013 ± 0.0006    | 0.00117 ± 0.00006             | N/D                                       | 0.00080 ± 0.00004                        | 0.00063 ± 0.00002                      | 0.00053 ± 0.00004                       |
| OAT4                            | 0.0024 ± 0.0001    | 0.001515 ± 0.000008           | N/D                                       | 0.00049 ± 0.00006                        | 0.00039 ± 0.00004                      | 0.00032 ± 0.00002                       |
| OCTN1                           | 0.00207 ± 0.00003  | 0.00121 ± 0.00003             | N/D                                       | 0.00189 ± 0.00003                        | 0.00273 ± 0.00003                      | 0.0031 ± 0.0001                         |
| OCTN2                           | 0.034 ± 0.001      | 0.0179 ± 0.0004               | N/D                                       | 0.0183 ± 0.0003                          | 0.0166 ± 0.0002                        | 0.0146 ± 0.0002                         |
| P-gp                            | 0.024 ± 0.008      | 0.0198 ± 0.0003               | N/D                                       | 0.0180 ± 0.0006                          | 0.012 ± 0.002                          | 0.0083 ± 0.0001                         |

**Table S3. Relative mRNA expression of renal drug transporters in PTECs prior to and after 48 hours of vehicle or cytokine cocktail treatment for donor 6 (D6).** The relative expression of transporter genes for each donor was normalized to the expression of the GAPDH, the housekeeping gene. The  $C_t$  values of GAPDH in this donor ranges from 21 to 22 for all the samples. N/D, not determined.

| Donor                           | Donor 6            |                               |                                           |                                          |                                        |                                         |
|---------------------------------|--------------------|-------------------------------|-------------------------------------------|------------------------------------------|----------------------------------------|-----------------------------------------|
| Treatment Group<br>Transporter  | Prior to treatment | 48 hours of vehicle treatment | 48 hours of 0.01 ng/mL cocktail treatment | 48 hours of 0.1 ng/mL cocktail treatment | 48 hours of 1 ng/mL cocktail treatment | 48 hours of 10 ng/mL cocktail treatment |
| <b>Basolateral Transporters</b> |                    |                               |                                           |                                          |                                        |                                         |
| OAT1                            | 0.00324 ± 0.00009  | 0.00049 ± 0.00007             | N/D                                       | 0.00016 ± 0.00001                        | 0.000140 ± 0.000004                    | 0.000242 ± 0.000008                     |
| OAT3                            | 0.0023 ± 0.0004    | 0.00044 ± 0.00003             | N/D                                       | 0.00041 ± 0.00002                        | 0.00033 ± 0.00002                      | 0.00037 ± 0.00001                       |
| OATP4C1                         | 0.186 ± 0.003      | 0.014 ± 0.001                 | N/D                                       | 0.011 ± 0.002                            | 0.0067 ± 0.0006                        | 0.006 ± 0.003                           |
| OCT2                            | 0.056 ± 0.002      | 0.036 ± 0.002                 | N/D                                       | 0.020 ± 0.001                            | 0.0132 ± 0.0002                        | 0.0097 ± 0.0008                         |
| <b>Apical Transporters</b>      |                    |                               |                                           |                                          |                                        |                                         |
| BCRP                            | 0.00071 ± 0.00003  | 0.00058 ± 0.00005             | N/D                                       | 0.00067 ± 0.00005                        | 0.00067 ± 0.00004                      | 0.00046 ± 0.00002                       |
| MATE1                           | 0.0071 ± 0.0006    | 0.0048 ± 0.0003               | N/D                                       | 0.0039 ± 0.0001                          | 0.00367 ± 0.00009                      | 0.0043 ± 0.0002                         |
| MATE2-K                         | 0.0081 ± 0.0002    | 0.0015 ± 0.0001               | N/D                                       | 0.00070 ± 0.00008                        | 0.00034 ± 0.00002                      | 0.00031 ± 0.00002                       |
| MRP2                            | 0.0018 ± 0.0005    | 0.0016 ± 0.0001               | N/D                                       | 0.00405 ± 0.00007                        | 0.0026 ± 0.0002                        | 0.003 ± 0.001                           |
| MRP3                            | 0.017 ± 0.002      | 0.0208 ± 0.0010               | N/D                                       | 0.0262 ± 0.0007                          | 0.0255 ± 0.0005                        | 0.032 ± 0.003                           |
| MRP4                            | 0.021 ± 0.002      | 0.013 ± 0.001                 | N/D                                       | 0.015 ± 0.001                            | 0.0120 ± 0.0004                        | 0.0137 ± 0.0007                         |
| OAT4                            | 0.00187 ± 0.00005  | 0.0015 ± 0.0003               | N/D                                       | 0.0008 ± 0.0002                          | 0.00045 ± 0.00004                      | 0.000494 ± 0.000008                     |
| OCTN1                           | 0.00117 ± 0.00006  | 0.00084 ± 0.00008             | N/D                                       | 0.0021 ± 0.0002                          | 0.00177 ± 0.00003                      | 0.0024 ± 0.0002                         |
| OCTN2                           | 0.017 ± 0.004      | 0.0144 ± 0.0009               | N/D                                       | 0.012 ± 0.001                            | 0.0097 ± 0.0005                        | 0.009 ± 0.004                           |
| P-gp                            | 0.0170 ± 0.0008    | 0.032 ± 0.002                 | N/D                                       | 0.039 ± 0.002                            | 0.037 ± 0.002                          | 0.0252 ± 0.0004                         |

**Table S4. Relative mRNA expression of renal drug transporters in PTECs prior to and after 48 hours of vehicle or cytokine cocktail treatment for donor 7 (D7).** The relative expression of transporter genes for each donor was normalized to the expression of the GAPDH, the housekeeping gene. The  $C_t$  values of GAPDH in this donor ranges from 17.5 to 18 for all the samples.

| Donor                           | Donor 7             |                               |                                           |                                          |                                        |                                         |
|---------------------------------|---------------------|-------------------------------|-------------------------------------------|------------------------------------------|----------------------------------------|-----------------------------------------|
| Treatment Group<br>Transporter  | Prior to treatment  | 48 hours of vehicle treatment | 48 hours of 0.01 ng/mL cocktail treatment | 48 hours of 0.1 ng/mL cocktail treatment | 48 hours of 1 ng/mL cocktail treatment | 48 hours of 10 ng/mL cocktail treatment |
| <b>Basolateral Transporters</b> |                     |                               |                                           |                                          |                                        |                                         |
| OAT1                            | 0.00055 ± 0.00007   | 0.000051 ± 0.000005           | 0.000017 ± 0.000004                       | 0.0000037 ± 0.0000004                    | 0.000054 ± 0.000001                    | 0.000020 ± 0.000002                     |
| OAT3                            | 0.00086 ± 0.00002   | 0.000054 ± 0.000009           | 0.000023 ± 0.000001                       | 0.0000042 ± 0.000002                     | 0.00004 ± 0.00002                      | 0.0000085 ± 0.0000008                   |
| OATP4C1                         | 0.13 ± 0.03         | 0.0150 ± 0.0007               | 0.0158 ± 0.0002                           | 0.0147 ± 0.0003                          | 0.0127 ± 0.0004                        | 0.008 ± 0.003                           |
| OCT2                            | 0.0124 ± 0.0003     | 0.0071 ± 0.0004               | 0.00463 ± 0.00005                         | 0.00295 ± 0.00003                        | 0.00225 ± 0.00007                      | 0.00193 ± 0.00009                       |
| <b>Apical Transporters</b>      |                     |                               |                                           |                                          |                                        |                                         |
| BCRP                            | 0.00056 ± 0.00006   | 0.00044 ± 0.00002             | 0.000280 ± 0.000002                       | 0.000240 ± 0.000009                      | 0.00021 ± 0.00002                      | 0.000144 ± 0.000005                     |
| MATE1                           | 0.0045 ± 0.0004     | 0.00134 ± 0.00007             | 0.001092 ± 0.000005                       | 0.001277 ± 0.000006                      | 0.00196 ± 0.00002                      | 0.00137 ± 0.00002                       |
| MATE2-K                         | 0.000232 ± 0.000009 | 0.000049 ± 0.000001           | 0.000037 ± 0.000002                       | 0.000005 ± 0.000001                      | 0.000008 ± 0.000002                    | 0.000007 ± 0.000002                     |
| MRP2                            | 0.0010 ± 0.0001     | 0.000218 ± 0.000005           | 0.000172 ± 0.000006                       | 0.000152 ± 0.000009                      | 0.000103 ± 0.000005                    | 0.000151 ± 0.000009                     |
| MRP3                            | 0.0068 ± 0.0005     | 0.0034 ± 0.0005               | 0.00492 ± 0.00003                         | 0.0081 ± 0.0002                          | 0.0135 ± 0.0006                        | 0.0169 ± 0.0005                         |
| MRP4                            | 0.0151 ± 0.0006     | 0.0129 ± 0.0005               | 0.0099 ± 0.0004                           | 0.0075 ± 0.0002                          | 0.0089 ± 0.0002                        | 0.0095 ± 0.0004                         |
| OAT4                            | 0.000078 ± 0.000004 | 0.000047 ± 0.000002           | 0.000030 ± 0.000002                       | 0.0000251 ± 0.0000009                    | 0.0000164 ± 0.0000007                  | 0.000016 ± 0.000004                     |
| OCTN1                           | 0.00077 ± 0.00008   | 0.000316 ± 0.000003           | 0.000403 ± 0.000002                       | 0.000601 ± 0.000006                      | 0.00119 ± 0.00006                      | 0.00118 ± 0.00004                       |
| OCTN2                           | 0.0124 ± 0.0004     | 0.0087 ± 0.0004               | 0.0063 ± 0.0002                           | 0.0072 ± 0.0001                          | 0.0092 ± 0.0004                        | 0.0080 ± 0.0003                         |
| P-gp                            | 0.072 ± 0.0002      | 0.0055 ± 0.0002               | 0.00510 ± 0.00007                         | 0.0052 ± 0.0002                          | 0.0032 ± 0.0001                        | 0.00281 ± 0.00006                       |

**Table S5. Relative mRNA expression of renal drug transporters in PTECs prior to and after 48 hours of vehicle or cytokine cocktail treatment for donor 9 (D9).** The relative expression of transporter genes for each donor was normalized to the expression of the GAPDH, the housekeeping gene. The  $C_t$  values of GAPDH in this donor ranges from 18 to 18.5 for all the samples.

| Donor                           | Donor 9            |                               |                                           |                                          |                                        |                                         |
|---------------------------------|--------------------|-------------------------------|-------------------------------------------|------------------------------------------|----------------------------------------|-----------------------------------------|
| Treatment Group<br>Transporter  | Prior to treatment | 48 hours of vehicle treatment | 48 hours of 0.01 ng/mL cocktail treatment | 48 hours of 0.1 ng/mL cocktail treatment | 48 hours of 1 ng/mL cocktail treatment | 48 hours of 10 ng/mL cocktail treatment |
| <b>Basolateral Transporters</b> |                    |                               |                                           |                                          |                                        |                                         |
| OAT1                            | 0.00032 ± 0.00003  | 0.000050 ± 0.000004           | 0.000059 ± 0.000004                       | 0.0000362 ± 0.0000006                    | 0.000043 ± 0.000004                    | 0.00005 ± 0.00004                       |
| OAT3                            | 0.0031 ± 0.0002    | 0.00024 ± 0.00002             | 0.00019 ± 0.00001                         | 0.000157 ± 0.000001                      | 0.00018 ± 0.00001                      | 0.00011 ± 0.00004                       |
| OATP4C1                         | 0.228 ± 0.004      | 0.0226 ± 0.0007               | 0.014 ± 0.001                             | 0.0126 ± 0.0004                          | 0.0066 ± 0.0001                        | 0.00157 ± 0.00009                       |
| OCT2                            | 0.022 ± 0.004      | 0.0125 ± 0.0006               | 0.0097 ± 0.0004                           | 0.0076 ± 0.0006                          | 0.0060 ± 0.0002                        | 0.0037 ± 0.0002                         |
| <b>Apical Transporters</b>      |                    |                               |                                           |                                          |                                        |                                         |
| BCRP                            | 0.00030 ± 0.00004  | 0.00022 ± 0.00001             | 0.000329 ± 0.000008                       | 0.00029 ± 0.00002                        | 0.00030 ± 0.00001                      | 0.00017 ± 0.00001                       |
| MATE1                           | 0.0053 ± 0.0006    | 0.0020 ± 0.0001               | 0.00036 ± 0.00009                         | 0.00200 ± 0.00003                        | 0.00239 ± 0.00001                      | 0.0021 ± 0.0001                         |
| MATE2-K                         | 0.0051 ± 0.0004    | 0.0013 ± 0.00004              | 0.00152 ± 0.00006                         | 0.00063 ± 0.00001                        | 0.00055 ± 0.00002                      | 0.00027 ± 0.00003                       |
| MRP2                            | 0.0014 ± 0.0007    | 0.00113 ± 0.00008             | 0.00117 ± 0.00005                         | 0.00085 ± 0.00005                        | 0.00058 ± 0.00002                      | 0.00050 ± 0.00004                       |
| MRP3                            | 0.0136 ± 0.0003    | 0.0130 ± 0.0006               | 0.0210 ± 0.0009                           | 0.0319 ± 0.0007                          | 0.053 ± 0.006                          | 0.038 ± 0.005                           |
| MRP4                            | 0.0093 ± 0.0005    | 0.0075 ± 0.0004               | 0.0087 ± 0.0004                           | 0.0081 ± 0.0004                          | 0.0064 ± 0.0004                        | 0.0043 ± 0.0001                         |
| OAT4                            | 0.0063 ± 0.0006    | 0.0037 ± 0.0002               | 0.0040 ± 0.0001                           | 0.0022 ± 0.0001                          | 0.0020 ± 0.0002                        | 0.0020 ± 0.0001                         |
| OCTN1                           | 0.00041 ± 0.00006  | 0.00027 ± 0.00001             | 0.00037 ± 0.00001                         | 0.00069 ± 0.00006                        | 0.001133 ± 0.000005                    | 0.00150 ± 0.00006                       |
| OCTN2                           | 0.0092 ± 0.0005    | 0.0066 ± 0.0002               | 0.0087 ± 0.0004                           | 0.0071 ± 0.0004                          | 0.0060 ± 0.0004                        | 0.0037 ± 0.0004                         |
| P-gp                            | 0.00390 ± 0.00004  | 0.0042 ± 0.0002               | 0.0068 ± 0.0001                           | 0.0036 ± 0.0001                          | 0.00244 ± 0.00009                      | 0.00141 ± 0.00003                       |
